# Supplementary material for: NEK6 Regulates Redox Balance and DNA Damage Response in DU-145 Prostate Cancer Cells
Source: MDPI journal article supplement (doi:10.3390/cells12020256), 2023-01-07

**Supplementary figure S1 (Figure S1).** Detection of up to four indels in NEK6-KO cell lines by Sanger-type sequencing.

**NEK6-KO (83.7)**

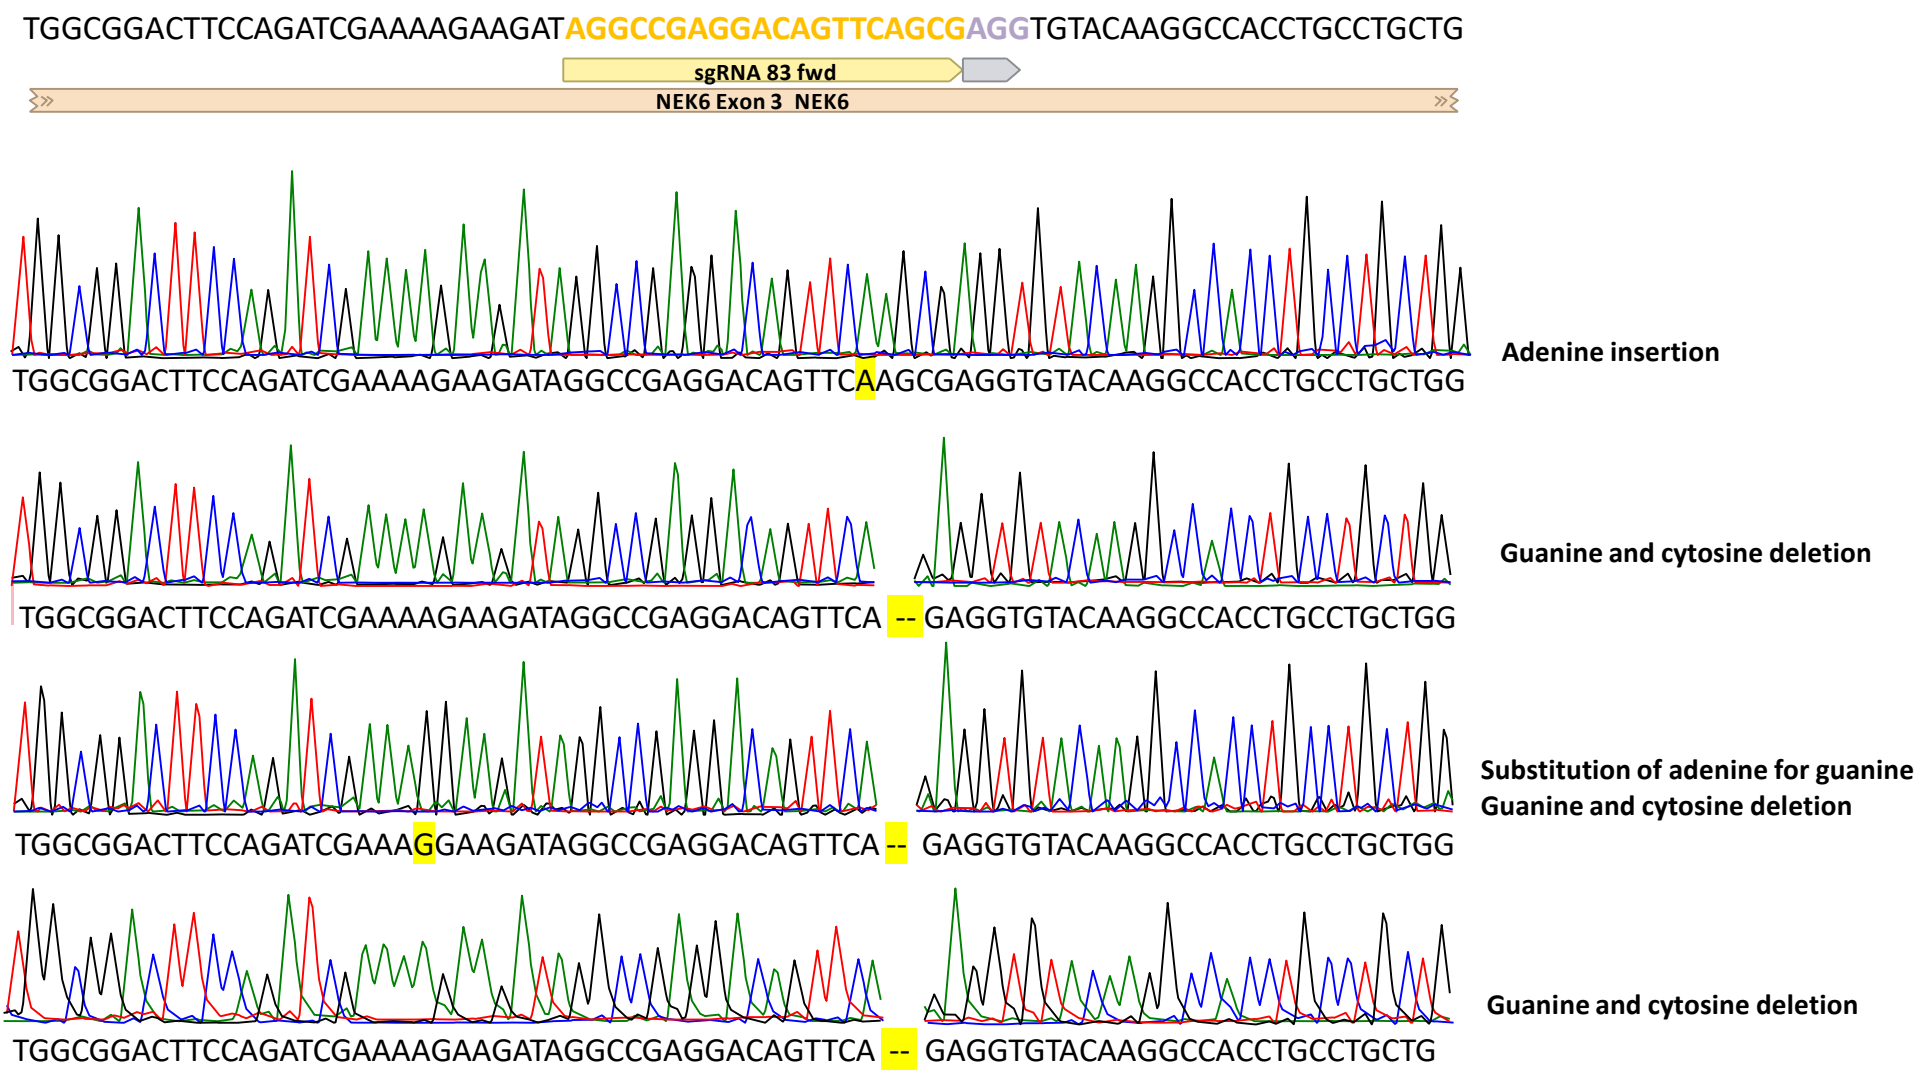

Figure S1 (cont.)

NEK6-KO (83.14)

TGGCGGACTTCCAGATCGAAAAGAAGATAGGCCGAGGACAGTTCAGCGAGGTGTACAAGGCCACCTGCCTGCTG

sgRNA 83 fwd

NEK6 Exon 3 NEK6

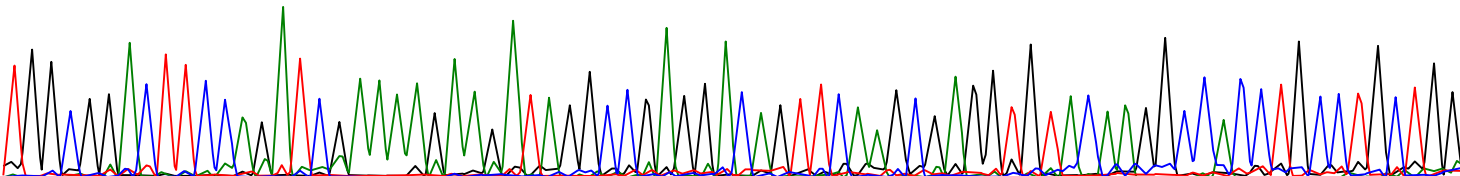

Adenine insertion

TGGCGGACTTCCAGATCGAAAAGAAGATAGGCCGAGGACAGTTCAAGCGAGGTGTACAAGGCCACCTGCCTGCTGG

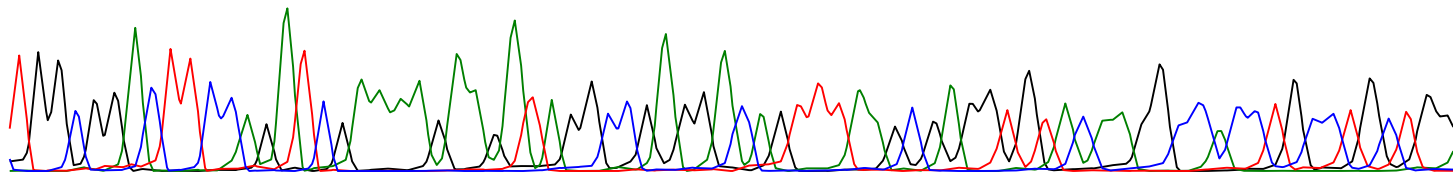

Substitution of cytosine for thymine  
Adenine insertion

TGGCGGACTTCCAGATCGAAAAGAAGATAGGCCGAGGACAGTTTAAGCGAGGTGTACAAGGCCACCTGCCTGCTGG

Figure S1 (cont.)

NEK6-KO (56.3)

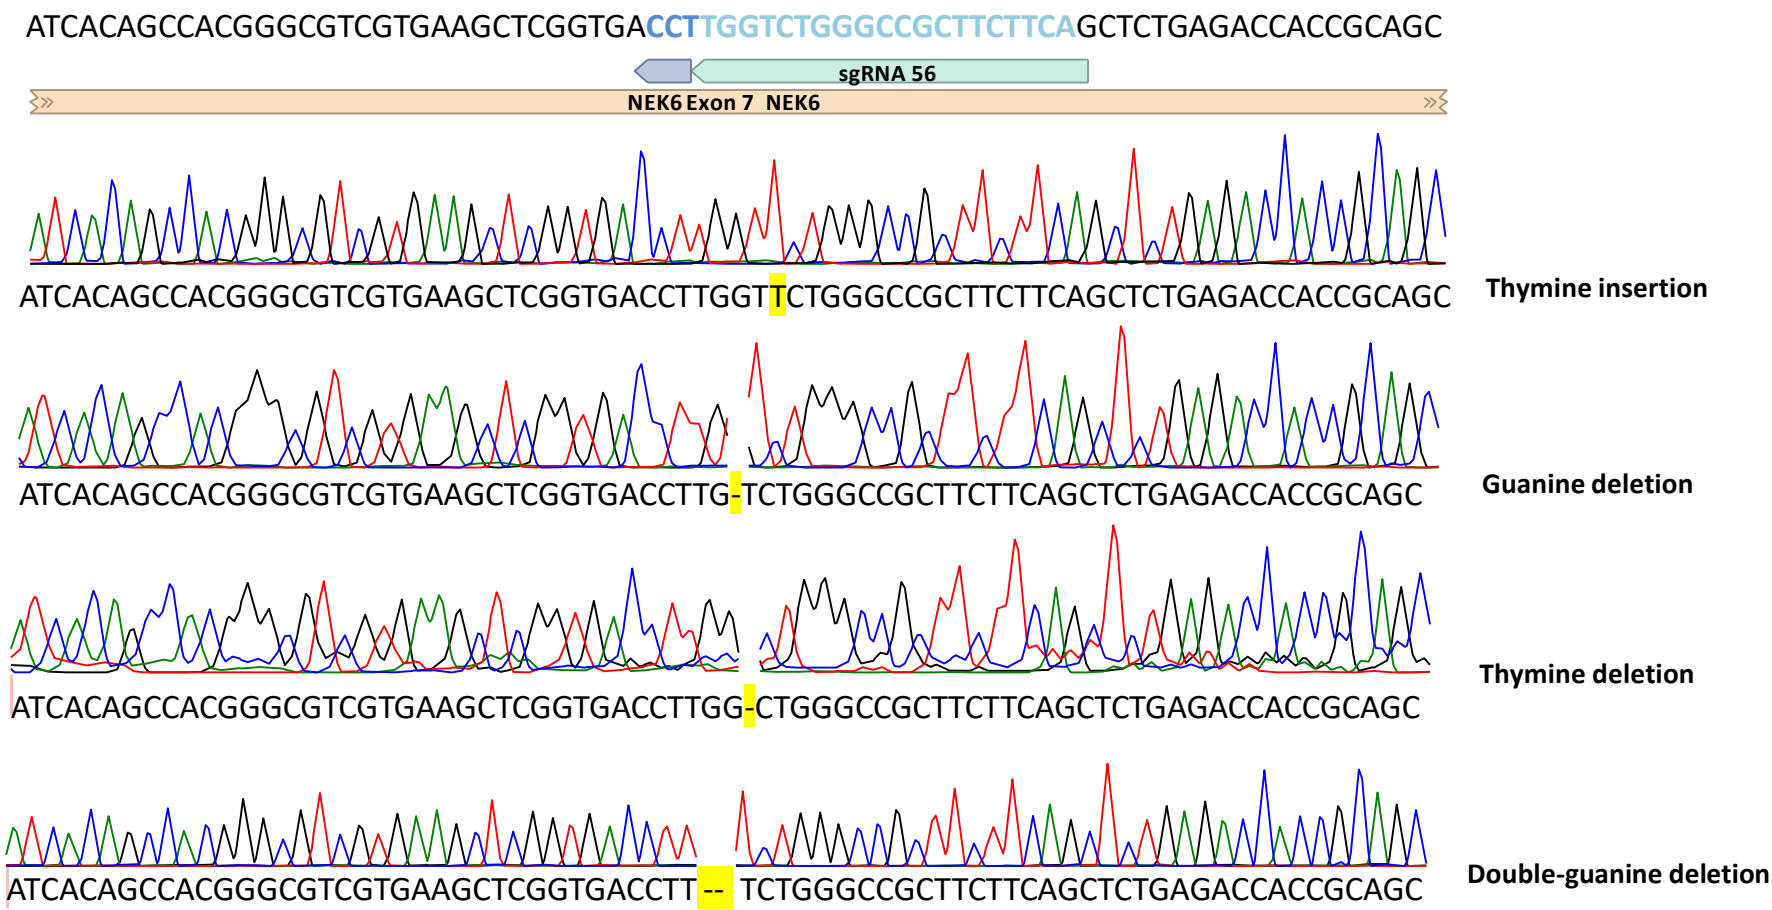

Figure S1 (cont.)

NEK6-KO (56.5)

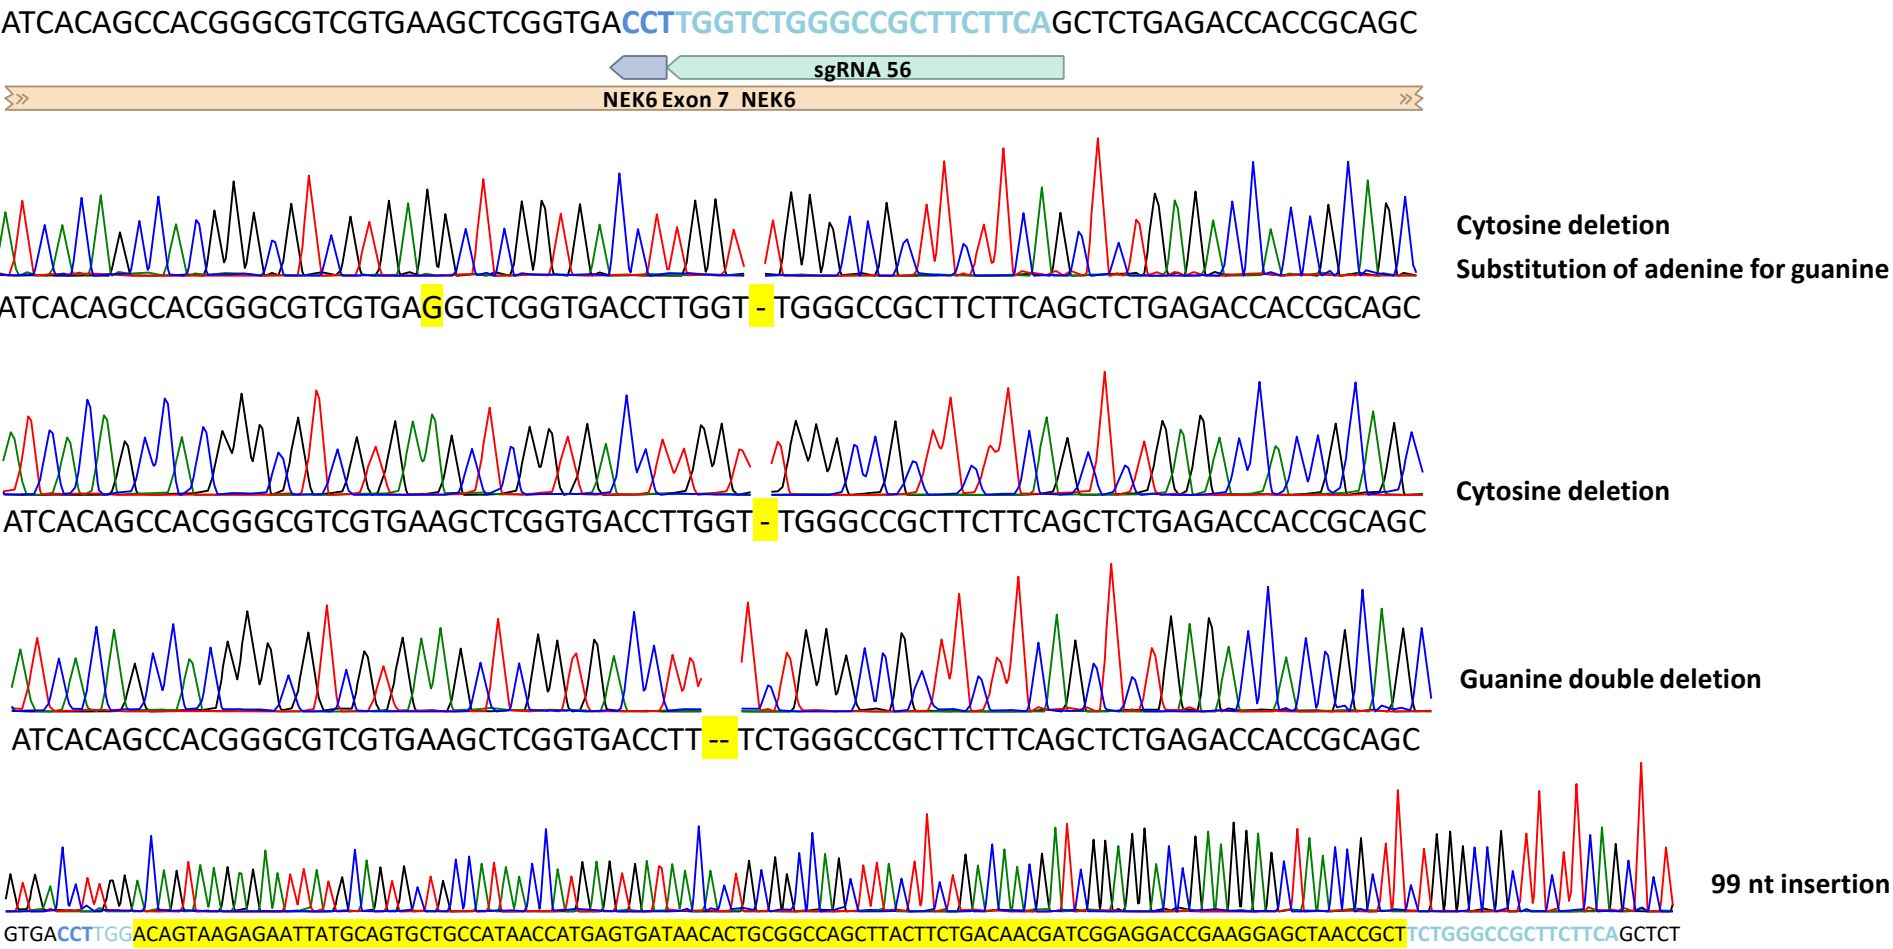

**Supplementary figure S2 (Figure S2).** Knockout of NEK6 alters NEK2, NEK7, NEK9, and NEK11 expression.

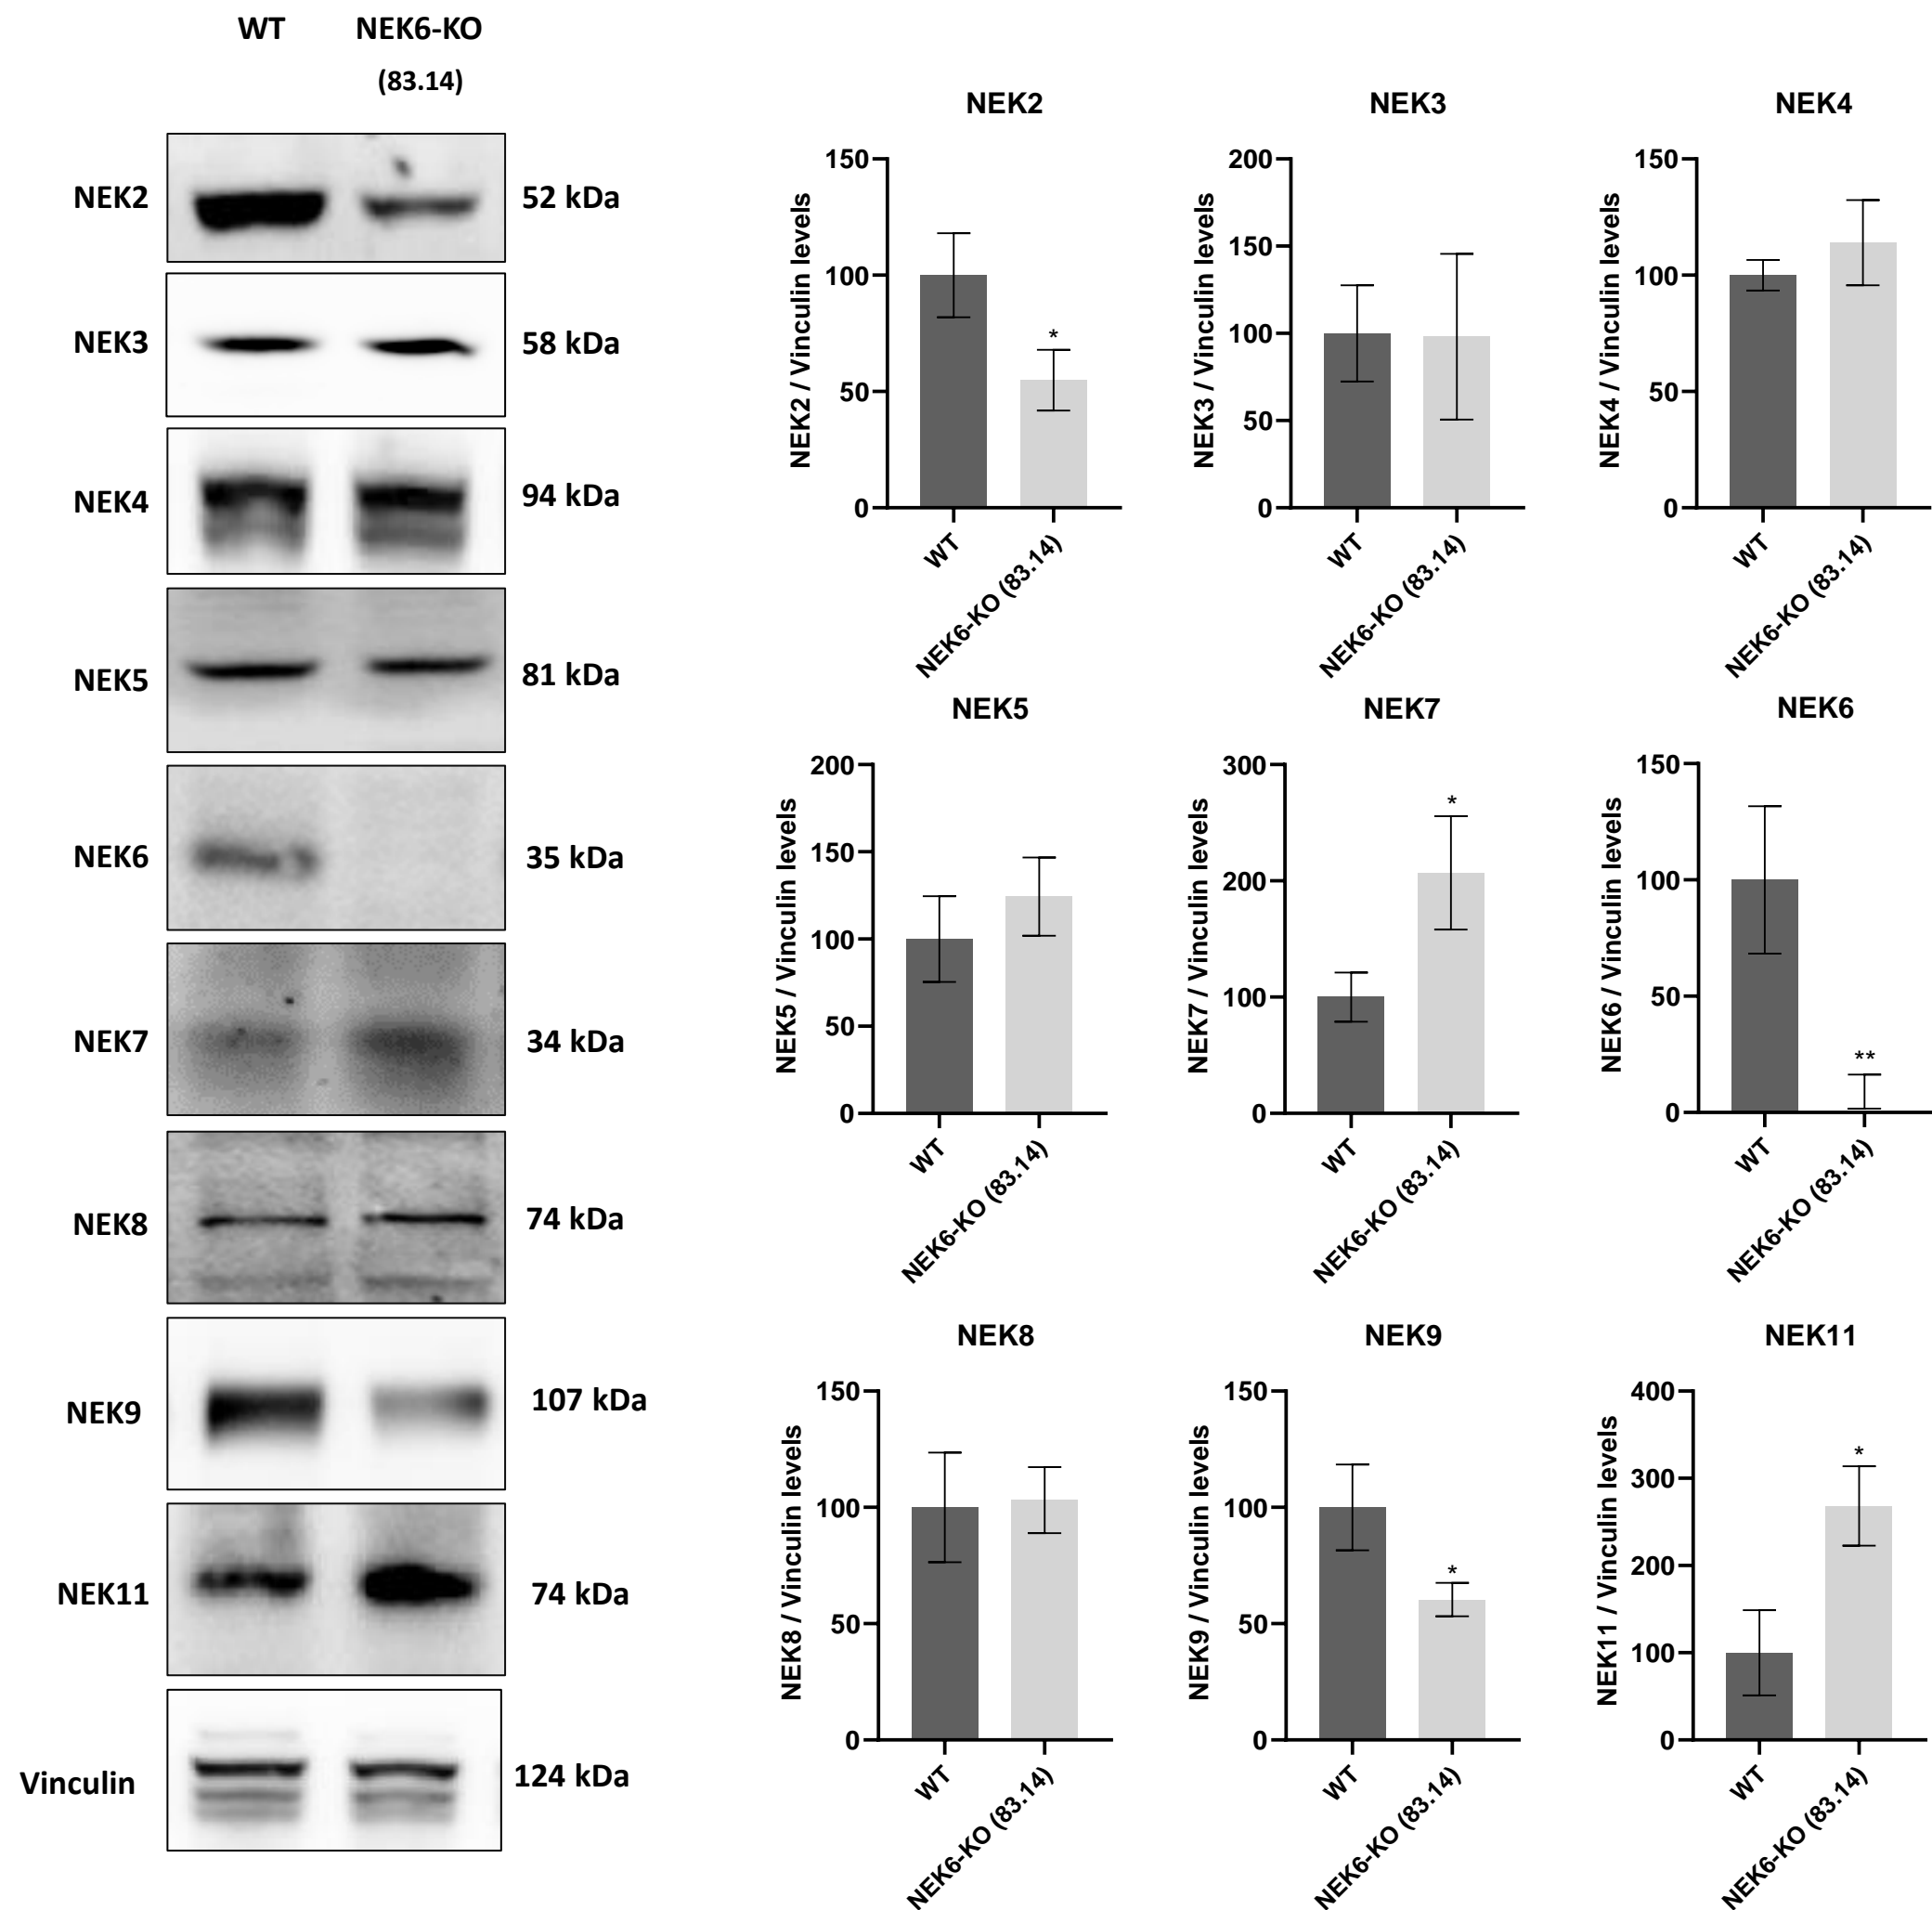

Supplement: s1 [file s1]
